# Supplementary material for: Beliefs About Emotion Are Tied to Beliefs About Gender: The Case of Men’s Crying in Competitive Sports
Source: Front Psychol. 2019 Dec 13;10:2765. doi: 10.3389/fpsyg.2019.02765 (PMC6923274; doi:10.3389/fpsyg.2019.02765)
Supplement: TABLE S1 — Full data set for Study 1. For the variable JobIV, 0 = nursing and 1 = firefighting. For the variable GenderIV, 0 = female target and 1 = male target. [file Table_1.xlsx]

## Sheet: Sheet1
Response ID	AttnChk1	AttnChk1Corr	AttnChk2	AttnChk2Corr	AttnChk3	AttnChk3Corr	TotalAttnChkCorr	Approp1	Approp2	Approp3	Approp3_R	Strong1	Strong2	Strong3	Strong3_R	Status1	Status2	Status3	Warmth1	Warmth2	Warmth3	Warmth4	Warmth4_R	Warmth5	Warmth6	Communal1	Communal1_R	Communal1	Communal3	Communal4	Masc	Fem	Post_Clear	Post_Suggestions	Post_Comments	Demo_Race	Demo_Race_TEXT	Demo_Gender	Demo_English	Demo_USCitizen	Demo_Citizen_Text	GenderIV	JobIV	AppropAvg	StrongAvg	StatusAvg	WarmAvg	CommAvg	CommNEWAvg
R_eRG8Ol7VeIBUJqR	7	1	1	1	7	1	3	7	5	1	7	6	5	2	6	6	4	4	7	7	7	1	7	6	6	1	7	6	7	7	5	5	Yes.			7		1	1	1		0	1	6.33	5.67	4.67	6.67	6.67	6.67
R_2gUby6n3F7FI4BL	7	1	1	1	7	1	3	6	6	2	6	3	3	5	3	6	5	4	7	7	7	1	7	7	7	1	7	7	7	7	5	6	I thought the instructions were clear and easy to follow. Especially the trick questions that told you what to choose.			7		1	1	1		0	1	6	3	5	7	7	7
R_ea1GOJ3rgKF6Eap	7	1	1	1	7	1	3	7	7	1	7	5	5	2	6	7	7	6	7	7	7	1	7	7	7	1	7	7	4	7	4	6	Yes they were very straight forward	No I think it is simple and straight to the point	First non boring study I have had to do!	8		1	1	1		0	1	7	5.33	6.67	7	6	6
R_4H4WOpMQh8NfcpL	7	1	1	1	7	1	3	7	7	1	7	6	6	2	6	6	7	6	7	7	7	1	7	7	7	1	7	7	6	7	2	6	yes, they went with the reading that was at the beginning, but there were some random questions about nursing that didn't deal with Jessica.			7		1	1	1		0	1	7	6	6.33	7	6.67	6.67
R_0JSH3ydHXcCVg2N	7	1	1	1	7	1	3	7	7	1	7	5	5	3	5	6	6	6	6	7	6	2	6	6	6	7	1	6	7	6	4	4	Yes, the questions were all written out and descriptive. I thought that some of the questions were redundent, but for the most part easy to follow.	Make less redundent questions. I understand that they are probably for people who are just trying to skim through the questionnarie, but they retract my interest in the survey.		7		2	1	1		0	1	7	5	6	6.17	6.33	6.33
R_4T1E52dJf1Iayhf	7	1	1	1	7	1	3	7	5	2	6	4	4	4	4	6	5	5	6	6	6	1	7	5	5	1	7	5	6	5	1	6	Yes	No	No	8		2	1	1		0	1	6	4	5.33	5.83	5.33	5.33
R_0SpisJ5IkEPXdYN	7	1	1	1	7	1	3	6	6	2	6	4	5	4	4	6	5	5	7	7	7	1	7	6	7	1	7	6	7	6	2	6	Yes, the questions were clear and I understood exactly what was being asked.	None.	None.	7		1	1	1		0	1	6	4.33	5.33	6.83	6.33	6.33
R_01lTYm2IvuGOoV7	7	1	1	1	7	1	3	7	7	2	6	6	5	2	6	7	6	6	7	7	7	1	7	7	7	1	7	7	7	7	2	5	Yes,the instructions were very easy to follow.	No suggestions	No	7		1	1	1		0	1	6.67	5.67	6.33	7	7	7
R_2hnnEeqPQlOvwrP	7	1	1	1	7	1	3	3	2	5	3	4	3	5	3	5	4	5	6	7	6	2	6	4	5	1	7	4	6	5	4	4	Yes, I knew exactly what to do.		I've never completed a study like this before!	7		1	1	1		0	1	2.67	3.33	4.67	5.67	5	5
R_e9FK2zK6v4DpNzv	7	1	1	1	7	1	3	6	6	2	6	4		3	5	5	5	5	4	5	6	1	7	6	6	1	7	5	5	4	2	5	yes they were simple	no	smart to throw in the questions with the answers so people pay attention	7		1	1	1		0	1	6		5	5.67	4.67	4.67
R_e4m8kEZpF0BP0jP		1	1	1	7	1	3	7	6	2	6	5	4	5	3	7	7	5	7	7	7	1	7	7	7	1	7	7	7	7	3	6	Yes, the questions were very clearn and easy to understand.	none	none	7		1	1	1		0	1	6.33	4	6.33	7	7	7
R_7UkFEporii1yyJn	7	1	1	1	7	1	3	7	7	1	7	6	6	1	7	7	7	7	6	7	7	1	7	7	7	1	7	7	5	6	3	5	Yes, the questions were clearly stated, and were easy to answer.	No.	No.	7		2	1	1		0	1	7	6.33	7	6.83	6	6
R_aY1uHt7EC226E1T	7	1	1	1	7	1	3	7	6	1	7	6	6	3	5	6	6	5	6	6	6	1	7	6	6	1	7	6	6	6	4	4	Yes		no	8		1	1	1		0	1	6.67	5.67	5.67	6.17	6	6
R_eYfAXlE9wYonglD	7	1	1	1	7	1	3	6	3	5	3	4	4	4	4	4	3	2	7	7	7	1	7	5	7	1	7	7	7	7	2	6	Yes, everything was self-explanatory from the directions.			7		1	1	1		0	1	4	4	3	6.67	7	7
R_elKUzcFHpL01pcx	7	1	1	1	7	1	3	6	6	2	6	3	3	5	3	5	5	5	6	7	7	1	7	7	7	1	7	6	6	6	3	5	yes	no	No	7		1	1	1		0	1	6	3	5	6.83	6	6
R_71mK1KbopZ2kXpH	7	1	1	1	7	1	3	6	6	2	6	5	3	3	5	5	5	4	4	5	6	4	4	4	4	1	7	5	6	6	4	4	I thought they were easy to understand and clear- no problems.	Stop expecting us to not put any effort into these! I felt that it was a little condescending	Nope!	7		1	1	1		0	1	6	4.33	4.67	4.5	5.67	5.67
R_e5n8DnaySoSRGyF	7	1	1	1	7	1	3	5	7	1	7	6	6	3	5	7	7	5	5	4	6	1	7	5	5	1	7	4	5	5	4	5	Yes.	No.	No.	7		1	1	1		0	1	6.33	5.67	6.33	5.33	4.67	4.67
R_8dFaDWohqmwmduZ	7	1	1	1	7	1	3	7	6	1	7	5	5	3	5	6	6	5	6	6	6	1	7	6	6	1	7	6	6	6	5	6	Yes, as long as the directions were read it was not difficult to complete the task.	No, this survey was easy to complete.	nope	7		1	1	1		0	1	6.67	5	5.67	6.17	6	6
R_6zHo5Y3TLYXfbO5	7	1	1	1	7	1	3	7	6	2	6	6	6	5	3	6	6	6	7	7	7	1	7	7	7	1	7	5	7	6	5	6	Yes, all of the instructions were clear and easy to follow. I read the directions and was able to move along smoothly through the questions.	No, I have no suggestions for improving this survey. I thought it was very well put together.	No, I have no other comments regarding this study.	7		1	1	1		0	1	6.33	5	6	7	6	6
R_4T4Bq10Bf8x18Vf	7	1	1	1	7	1	3	7	5	1	7	6	5	1	7	4	5	3	6	7	7	1	7	7	7	7	1	7	6	6	2	6	Pretty Clear	Nope	Nope	7		2	1	1		0	1	6.33	6	4	6.83	6.33	6.33
R_8xiU5iJEAg86i2N	7	1	1	1	7	1	3	7	6	1	7	7	7	1	7	7	7	7	6	7	6	1	7	6	6	1	7	6	6	6	4	5	Very easy to follow.	I felt I may have answered some of the questions poorly because I read the prompt in detail, but was unaware of the extent of the questions upon the passage. I would have definitely reread the passage multiple times to properly absorb every detail had I kown this. Unless this was the intention of the survey, to give a first impression type view of Jessica's heroics without careful analysis, in wh…	At times, I felt like I had no choice in my answer. Example, putting a 1-7 choice on how strongly I felt of Jessica being kind or trustworthy. I couldn't justify putting a low number because she saved a child's life, but at the same time, this is the onlyaspect of her life I know. On top of this, it is her job to do so. I don't think I can appropriately judge someone's character based on an extre…	7		2	1	1		0	1	6.67	7	7	6.33	6	6
R_7P0U5WE1U879wBD	7	1	1	1	7	1	3	6	4	4	4	5	5	2	6	6	6	6	6	6	6	1	7	6	6	1	7	6	7	6	1	1	Yes I felt that the instructions were clear.			7		2	1	1		0	1	4.67	5.33	6	6.17	6.33	6.33
R_efyuj0h6Eb2tvJb	7	1	1	1	7	1	3	6	6	3	5	5	5	2	6	7	6	6	5	6	6	1	7	4	4	2	6	4	4	5	4	4	Yes, it was a good length and well-structured. It wasn't too long and it didn't lose my attention.			7		1	1	1		0	1	5.67	5.33	6.33	5.33	4.33	4.33
R_77EtHYF99kO84FD	7	1	1	1	7	1	3	7	7	2	6	5	4	3	5	6	6	5	6	7	7	1	7	6	6	1	7	6	7	6	2	5	Yes all the instructions made sense and I was able to follow them easily.	I think an explanation box could be provided after some of the questions because people may interpret emotion differently then others. (For example, one question asked about weakness and some people may think that showing emotion is a weakness when other might disagree.) I think this might bring more clarity to the answers picked and allow people to expand on their thoughts.		7		1	1	1		0	1	6.67	4.67	5.67	6.5	6.33	6.33
R_6WPNayWhsTd4M97	7	1	4	0	7	1	2	4	4	4	4	4	4	4	4	4	4	4	4	4	5	2	6	4	5	2	6	5	5	5	3	5				2		2	1	1		0	1	4	4	4	4.67	5	5
R_51gBRDbKkAjlLmJ	7	1	1	1	7	1	3	6	6	2	6	6	5	3	5	7	7	6	6	6	6	2	6	6	6	1	7	6	6	5	2	6	Yes, everything was very clear and left me sure of my answers.	N/A	N/A	7		2	1	1		0	1	6	5.33	6.67	6	5.67	5.67
R_b7TmIC0lClNtuCh	7	1	1	1	7	1	3	7	5	2	6	3	3	3	5	4	3	3	7	7	7	1	7	7	7	1	7	7	7	7	3	7	Yes, they clearly explained what needed to be done.	No, I think the survey went well and was simple to understand and complete.	No, I do not.	7		1	1	1		0	1	6	3.67	3.33	7	7	7
R_51ngyffmxQ9I7SB	4	0	4	0	4	0	0	4	4	6	2	4	4	5	3	7	5	5	7	7	7	1	7	7	7	1	7	7	7	7	4	4	Mostly yes, although I did notice at times there were questions asking me to "Please select so and so number" which I found different from other surveys. I don't understand the intention of those questions, so I merely gave an answer that neither agreed nr disagreed with the statement.			1		2	1	1		0	1	3.33	3.67	5.67	7	7	7
R_2rzpePbi9ogC9RX	7	1	1	1	7	1	3	6	5	2	6	5	4	4	4	6	6	5	6	6	6	1	7	5	6	1	7	6	6	5	3	5	Yes they were.			7		2	1	1		0	1	5.67	4.33	5.67	6	5.67	5.67
R_0eTTGpjLLXR0aot	7	1	1	1	7	1	3	6	3	5	3	4	4	5	3	6	6	5	7	7	7	1	7	6	6	1	7	6	7	6	2	5	Yes, the instructions were very clear and easy to follow. It made the questions easy to respond to.	I do not have any suggestions to improve the survey. I thought overall it was a well worded survey that clear and precise qustions with no confusion.	No	7		1	1	1		0	1	4	3.67	5.67	6.67	6.33	6.33
R_cTuqrXGB5x7txiZ	7	1	1	1	7	1	3	4	3	5	3	4	4	3	5	5	5	4	7	7	7	1	7	7	7	1	7	7	7	7	1	5	Yes, very understandable. Made sense			7		1	1	1		0	1	3.33	4.33	4.67	7	7	7
R_82LvdfHBucqad9j	7	1	1	1	7	1	3	6	6	2	6	2	2	6	2	5	3	2	6	6	6	1	7	6	6	1	7	6	7	6	2	6	Yes, everything was well explained and easy to follow.			3		2	1	1		0	1	6	2	3.33	6.17	6.33	6.33
R_6QfUz5LHtArH3Q9	7	1	1	1	7	1	3	6	6	2	6	6	6	2	6	7	6	7	3	6	5	1	7	7	6	1	7	4	5	4	4	4	Yes, the instructions were clear and easy to follow.	I have no suggestions.	I found the study interesting. It drove me to consider how gender roles are present in society.	7		2	1	1		0	1	6	6	6.67	5.67	4.33	4.33
R_3IuoHmNNlpZ8MXb	7	1	1	1	7	1	3	6	5	4	4	3	3	3	5	5	4	3	5	5	5	1	7	5	5	1	7	3	7	5	3	5	Yes	make the beginning more clear		7		1	1	1		0	1	5	3.67	4	5.33	5	5
R_6xJSIRFrS3DBqwR	7	1	1	1	7	1	3	6	4	4	4	4	4	6	2	6	5	4	7	7	7	1	7	7	7	1	7	7	7	7	5	3	Yes I have no addition comments to provide.	No	No, overall it was simple to complete.	7		2	1	1		0	1	4.67	3.33	5	7	7	7
R_3mZ7i9E8TfYNITH	7	1	1	1	7	1	3	7	5	4	4	5	5	3	5	6	5	3	4	4	5	1	7	6	6	1	7	5	5	1	2	4	Yes the instructions were clear and easy to follow. There was no confusion related to the directions or what I was asked to do.	N/A	I like how this study subtly shows that someone can make a lot of assumptions about people from one small story, usually without even realizing that they do it.	8		1	1	1		0	1	5.33	5	4.67	5.33	3.67	3.67
R_3LhDTvB85UStJbL	7	1	1	1	7	1	3	6	5	1	7	5	5	1	7	7	7	6	4	4	4	1	7	4	4	1	7	4	7	4	4	4	Yes. They were.	No	No	7		2	1	1		0	1	6	5.67	6.67	4.5	5	5
R_9TeJlp5Q0TLxE6F	4	0	4	0	7	1	1	4	4	4	4	4	4	4	4	4	4	4	7	7		1	7	7	7	6	2	6	7	7	4	4	Yes they were!!! Good Job!	Nope. Every person's survey should be entitled to create the survey anyway they'd like to.	Nope.	2		2	1	1		0	1	4	4	4		6.67	6.67
R_3912AYBC8DYl1RP	7	1	1	1	7	1	3	7	7	1	7	3	3	5	3	5	5	2	6	7	7	1	7	6	5	1	7	5	7	5	1	7	Yes, the instructions were very easy to follow. They instructed me to do something, and I did it.	No	No	7		2	1	1		0	1	7	3	4	6.33	5.67	5.67
R_8hMrnAT4zjLmpGl	7	1	1	1	7	1	3	7	6	1	7	6	6	1	7	7	7	5	6	7	7	1	7	6	5	1	7	6	5	5	3	3	Yes, all instructions and questions were very clear and easy to follow.		I think this is a well constructed study to gauge peoples reactions to the females and males "typical" standards in society.	7		2	1	1		0	1	6.67	6.33	6.33	6.33	5.33	5.33
R_6X4sDayJLQckcxT	7	1	1	1	7	1	3	7	1	1	7	3	3	5	3	7	7	5	5	7	4	1	7	4	6	1	7	7	7	4	2	6	yes			7		2	1	1		0	1	5	3	6.33	5.5	6	6
R_5gyKEmqHJksxtAx	7	1	1	1	7	1	3	4	6	1	7	4	5	1	7	6	4	2	6	6	6	1	7	4	4	1	7	6	7	6	4	4	Yes, they were all clear and easy to follow.		For questions determining her niceness, likeability, etc. based on this snippet of her reaction to the situation, which could have been a biological response, I think there should be an option for cannot be determined. Unless however you're trying to figue out whether people are quick to associate emotional reactivity with these traits.	4		2	1	1		0	1	5.67	5.33	4	5.5	6.33	6.33
R_dhwkCGooyYq8UVT	7	1	1	1	7	1	3	5	3	5	3	3	3	5	3	3	3	2	7	7	7	1	7	7	7	1	7	7	7	7	2	6	Yes	No	No	7		2	1	1		0	1	3.67	3	2.67	7	7	7
R_6g9zTwYq9W3T6nz	7	1	1	1	7	1	3	6	6	2	6	3	3	5	3	4	4	4	6	6	7	2	6	6	7	1	7	6	7	6	2	6	Yes. They clearly stated what I was to do during this study.	No, I thought it was pretty straight forward.	No.	7		2	1	1		0	1	6	3	4	6.33	6.33	6.33
R_7WkNU4Z4PX0MQDz	7	1	1	1	7	1	3	7	7	1	7	4	4	2	6	7	7	5	7	7	7	1	7	7	7	1	7	6	6	6	5	5	Yes, all the questions were very clear. They did not contain issues such as the wording effect. I knew exactly what to do and what the values (1-7) corresponded to. The survey also did not try to trick me into making awkward answers and it also made sure was not simply choosing any old answers based on some of the questions that asked for specific answers.	Make the survey longer, with more situations. That one situation is a good example but there are many more out there that could possibly provide more data on the topic at hand.	I feel like the study was well-designed. While it was a little bit short, it assume it is quite efficient in collecting the data needed to readily prove a hypotheses for which the experiment was designed.	7		2	1	1		0	1	7	4.67	6.33	7	6	6
R_9FQwBG4kDd4Pwcl	7	1	1	1	7	1	3	2	4	5	3	2	3	5	3	4	2	1	6	7	7	1	7	5	5	1	7	7	7	7	1	7	Yes, the instructions were clear. I understood everything you wanted me to do.	Warn people that the excerpt is going to disappear and you'll never get to see it again. Then people will read it more closely.	This was very well made.	7		2	1	1		0	1	3	2.67	2.33	6.17	7	7
R_7QAVnkJONvatccl	7	1	1	1	7	1	3	6	4	4	4	3	3	3	5	3	7	4	5	6	5	2	6	6	6	1	7	7	5	5	3	3	Yes			7		1	1	1		0	1	4.67	3.67	4.67	5.67	5.67	5.67
R_2uf1tO29km1XlZP	7	1	1	1	7	1	3	6	6	2	6	5	5	2	6	6	7	5	7	7	7	1	7	7	7	1	7	7	7	6	3	5	Yes			7		1	1	1		0	1	6	5.33	6	7	6.67	6.67
R_5bvE8klsiajNJDT	7	1	1	1	7	1	3	6	5	2	6	5	6	3	5	6	3	2	6	6	6	2	6	4	5	1	7	4	6	5	5	3	Yes, it was easy to comprehend what was being asked.			7		1	1	1		0	1	5.67	5.33	3.67	5.5	5	5
R_eWO5iZnkHd7CXch	7	1	1	1	7	1	3	6	6	2	6	2	4	5	3	6	6	5	6	6	6	1	7	6	6	1	7	6	7	7	1	6	Yes, they were simple and easy to understand	No	No	8		1	1	1		0	1	6	3	5.67	6.17	6.67	6.67
R_6hWqWbga8YCXCYt	7	1	1	1	7	1	3	7	7	1	7	4	5	6	2	3	2	2	7	7	7	1	7	5	7	1	7	7	7	7	1	6	Yes, the instructions were very clear and simplified the process.	No	No	4		1	1	1		0	1	7	3.67	2.33	6.67	7	7
R_dcIY3uYWUVbmFrT	7	1	1	1	7	1	3	5	4	4	4	5	5	5	3	6	5	5	7	7	7	1	7	7	7	1	7	7	7	7	6	7	Yes, they were very clear.			7		1	1	1		0	1	4.33	4.33	5.33	7	7	7
R_0vzdyIA0GYfXEax	7	1	1	1	7	1	3	5	5	2	6	4	3	5	3	5	4	4		7	7	1	7	5	7	1	7	3	7	5	4	3	yes they were	No, it was good	no	7		2	1	1		0	1	5.33	3.33	4.33		5	5
R_6MxMVk8xyXvP9BP	7	1	1	1	7	1	3	6	5	3	5	5	4	3	5	5	6	6	7	7	7	1	7	6	7	1	7	6	6	6	3	5	The instructions were very clear and easy to follow.			7		2	1	1		0	1	5.33	4.67	5.67	6.83	6	6
R_bmCDaYclAHxWOgZ	7	1	1	1	7	1	3	7	6	4	4	4	4	4	4	5	5	4	6	6	6	1	7	4	5	1	7	7	4	6	3	5	The instructions were clear and I understood all of the necessary actions.			7		2	1	1		0	1	5.67	4	4.67	5.67	5.67	5.67
R_7aqVCtvRs0FpNOt	7	1	1	1	7	1	3	7	7	1	7	7	7	1	7	7	7	7	7	7	7	1	7	7	7	1	7	7	7	7	5	3	yes very simply and easy to understand it was a very straightforward survey.	No I would keep the surgery the same way.	very well done nice and simple	7		2	1	1		0	1	7	7	7	7	7	7
R_aeFRzHBYeYw80v3	7	1	1	1	7	1	3	7	7	2	6	6	4	5	3	6	7	5	7	7	7	1	7	7	7	1	7	6	7	6	3	6	Yes, very easy to follow based on the story line.	Maybe include the original on every passage as one completes the survey. It was sometimes hard to remember every detail of the story.	I thought this study was more interesting than others I have participated in.	7		1	1	1		0	1	6.67	4.33	6	7	6.33	6.33
R_a2BxncgIF423usZ	7	1	1	1	7	1	3	6	5	2	6	5	5	2	6	6	5	4	3	6	6	1	7	5	4	1	7	4	7	4	4	4	Yes	it would have been good to be able to go back and re-read Jessica's situation.	no	7		2	1	1		0	1	5.67	5.33	5	5.17	5	5
R_eJWuR3h5jq2FoFv	7	1	1	1	7	1	3	3	3	4	4	4	4	3	5	5	6	5	4	6	5	1	7	5	5	1	7	5	4	5	3	4	Yes. Every question was clear and easy to understand		No	7		2	1	1		0	1	3.33	4.33	5.33	5.33	4.67	4.67
R_0iiTjzEpA0uiq8t	7	1	1	1	7	1	3	7	7	1	7	5	5	3	5	7	7	4	6	6	6	1	7	4	6	7	1	6	3	4	4	4	Most of the instructions were clear and easy to follow, except when the participant was asked "How strong is Jessica emotionally/mentally" and "How tough is Jessica emotionally/mentally," because I interpreted them as the same question.			7		2	1	1		0	1	7	5	6	5.83	4.33	4.33
R_9TTr2mZzOPaNz49	7	1	1	1	7	1	3	6	6	2	6	3	3	4	4	5	2	2	4	4	4	4	4	4	4	4	4	4	4	4	1	7	yes. very easy	survey conducted well	no	7		2	1	1		0	1	6	3.33	3	4	4	4
R_1WYvfsjxsI5GeJD	7	1	1	1	7	1	3	7	7	1	7	2	2	5	3	4	6	3	6	6	6	1	7	7	7	1	7	7	6	6	1	6	Yes, the questions were worded that they were easy to understand.	Nope.	Nope.	7		2	1	1		0	1	7	2.33	4.33	6.5	6.33	6.33
R_4VEeVlwnlRw33BX	7	1	1	1	7	1	3	7	7	2	6	6	6	2	6	6	6	6	7	7	7	1	7	7	7	1	7	7	7	7	6	3	Yes	No	No	1		2	1	1		0	1	6.67	6	6	7	7	7
R_5pe1QDxaXY2XZ7n	7	1	1	1	7	1	3	7	6	2	6	4	4	4	4	4	5	6	6	6	6	2	6	4	5	1	7	4	6	5	1	6	Yes, the instructions seemed to be clear	nope	nope	7		2	1	1		0	1	6.33	4	5	5.5	5	5
R_3ggAbv0iB0HWiVf	7	1	1	1	7	1	3	5	3	5	3	3	3	5	3	5	5	3	6	6	6	1	7	6	6	1	7	6	6	6	4	4	Yes, they were very simple questions with to-the-point answers.	No	No	7		1	1	1		1	1	3.67	3	4.33	6.17	6	6
R_83cVAzdwUVVhCYZ	7	1	1	1	7	1	3	6	6	2	6	6	6	3	5	6	6	5	5	6	5	1	7	4	6	1	7	5	6	5	5	2	Yes. The instructions were simple; therefore I had no trouble at all following them.			7		1	1	1		1	1	6	5.67	5.67	5.5	5.33	5.33
R_6kQv4DASNFAialT	7	1	1	1	7	1	3	6	6	2	6	5	4	3	5	7	7	6	6	6	6	1	7	5	6	1	7	7	7	6	4	3	All of the instructions were very easy to follow. It was very straight forward.		No.	7		1	1	1		1	1	6	4.67	6.67	6	6.67	6.67
R_1UnwP9545C9LeD3	7	1	1	1	7	1	3	6	6	1	7	7	7	1	7	7	7	7	5	7	5	1	7	6	6	1	7	4	4	4	7	1	Yes			7		1	1	1		1	1	6.33	7	7	6	4	4
R_1zwN6Sm7R5tYGvb	7	1	1	1	7	1	3	7	7	1	7	6	4	2	6	6	5	5	7	7	6	1	7	6	7	1	7	6	7	6	5	3	Yes I found it very simple to answer each question	No	No	7		1	1	1		1	1	7	5.33	5.33	6.67	6.33	6.33
R_5h9cOquacKPb5xr	7	1	1	1	7	1	3	6	6	2	6	5	5	2	6	5	6	6	6	7	7	2	6	5	6	1	7	6	5	5	6	2	Yes.	No.	No.	7		2	1	1		1	1	6	5.33	5.67	6.17	5.33	5.33
R_etVkCm3gDy87RM9	7	1	1	1	7	1	3	6	5	2	6	6	6	2	6	6	7	6	6	7	6	2	6	6	6	1	7	6	5	6	6	2	Yes, the questions seemed very straightforward and easy to follow.	More situations. I personally think more would have provided better opinions even with the extra time to take it.		7		2	1	1		1	1	5.67	6	6.33	6.17	5.67	5.67
R_5gr34FaYt96Ra5f	7	1	1	1	7	1	3	7	7	1	7	2	2	4	4	5	5	6	5	7	7	1	7	6	7	1	7	5	7	4	4	4	Yes, all of the instructions accurately described what to do.			7		1	1	1		1	1	7	2.67	5.33	6.5	5.33	5.33
R_eJQpFYM3C5t3aBf	7	1	1	1	7	1	3	7	5	3	5	4	4	4	4	6	5	5	4	7	6	1	7	6	6	7	1	7	7	6	4	5	Yes, the instructions were concise and well stated. They were extremely easy to follow.			7		1	1	1		1	1	5.67	4	5.33	6	6.67	6.67
R_bEDKCSMmrYD6XZj	7	1	1	1	7	1	3	4	4	5	3	6	3	3	5	6	3	2	7	7	7	1	7	5	5	1	7	4	7	4	4	3	Yes, the instructions were clear to follow, but some of the personality questions (is he nice or trustworthy etc) were hard to answer.			7		1	1	1		1	1	3.67	4.67	3.67	6.33	5	5
R_9N5XqAY0QCFM7IN	7	1	1	1	7	1	3	7	7	1	7	4	3	4	4	6	6	4	7	7	7	1	7	7	7	1	7	6	5	6	6	2	Yes the instructions were clear cut and told us exactly how to answer. The questions were easy to understand.	I think this survey was perfect, I do not have any suggestions.	I'm curious how the answers vary from males to females.	9	Indian	1	1	1		1	1	7	3.67	5.33	7	5.67	5.67
R_8zQNuvKZUPhxeZv	7	1	1	1	7	1	3	6	6	2	6	4	4	3	5	7	7	7	6	7	7	1	7	6	6	1	7	5	6	6	4	3	Yes.	No.	No	7		1	1	1		1	1	6	4.33	7	6.5	5.67	5.67
R_6yeNsMeEvmPKk97	7	1	1	1	7	1	3	7	7	1	7	5	7	3	5	6	7	6	7	6	6	2	6	7	7	1	7	7	7	7	6	7	Yes very clear!	Nope very clear and concise	no	7		2	1	1		1	1	7	5.67	6.33	6.5	7	7
R_8k4292b0WDl2tVz	7	1	1	1	7	1	3	6	6	2	6	6	6	2	6	6	7	7	5	5	5	1	7	7	6	1	7	6	4	5	7	1	Yes	None	Nope	7		1	1	1		1	1	6	6	6.67	5.83	5	5
R_57LVFVuG68uL9C5	7	1	1	1	7	1	3	7	7	1	7	6	6	3	5	7	6	4	7	7	7	1	7	7	7	1	7	7	7	7	7	4	Yes they were all clear and easy to follow.	No	Why was I instructed to pick a certain answer on some questions?	7		1	1	1		1	1	7	5.67	5.67	7	7	7
R_aUXqAcPDqqDSHWd	7	1	1	1	7	1	3	5	5	2	6	5	5	4	4	5	4	3	6	7	7	1	7	6	7	1	7	5	7	5	4	3	Yes, they were very clear and easy to follow. None of the questions were tricky and there was always clarification if the question could have been thought to be challenging.			7		1	1	1		1	1	5.33	4.67	4	6.67	5.67	5.67
R_e4K03YxB1j1ot8N	7	1	1	1	7	1	3	6	6	2	6	4	4	3	5	6	6	4	7	7	7	1	7	7	7	1	7	7	7	7	5	3	Yes	I think the survey was easy to follow and understand.	N/A	7		2	1	1		1	1	6	4.33	5.33	7	7	7
R_4MkR4Z8OZubqYoB	7	1	1	1	7	1	3	7	5	3	5	6	6	1	7	7	7	7	6	6	6	1	7	6	7	1	7	5	6	5	6	2	Yes, very much so. And it wasn't extremely long and tedious like the last survey I completed.	Not really. It got straight to the point and was not long and tedious.		7		1	1	1		1	1	5.67	6.33	7	6.33	5.33	5.33
R_dbQVRL5Whl2ghrT	7	1	1	1	7	1	3	6	5	5	3	2	2	4	4	4	3	2	7	7	7	1	7	7	7	1	7	7	7	7	4	4	Yes, the only task necessary was to read the passage and answer the questions through a rating.			1		1	1	1		1	1	4.67	2.67	3	7	7	7
R_4M9lVfxKO2wwrYh	7	1	1	1	7	1	3	7	7	1	7	6	5	4	4	7	5	5	7	7	7	1	7	7	7	1	7	7	7	7	7	5	Yes, very easy to follow. Instructions were very clear.	No.	No.	7		1	1	1		1	1	7	5	5.67	7	7	7
R_2mIeceoQAoYiDqJ	7	1	1	1	7	1	3	7	6	2	6	5	5	5	3	6	6	6	6	7	7	1	7	6	7	1	7	7	5	6	5	2	Yes they were, I had no trouble.	No.	No.	7		1	1	1		1	1	6.33	4.33	6	6.67	6	6
R_dgTUO60vbI0cL8V	7	1	1	1	7	1	3	4	3	3	5	3	2	5	3	5	2	2	6	6	6	1	7	4	6	1	7	7	7	6	2	6	Yes I understood everything.	No	No	7		2	1	1		1	1	4	2.67	3	5.83	6.67	6.67
R_2nofJdOKyMbfIwt	7	1	1	1	7	1	3	6	6	2	6	4	4	5	3	6	5	5	6	6	5	1	7	6	6	1	7	6	7	5	5	3	Yes, everything made sense	No, it was very straightforward	No	7		2	1	1		1	1	6	3.67	5.33	6	6	6
R_5ooparEOJ3RBrbD	7	1	1	1	7	1	3	7	5	3	5	3	4	4	4	6	6	6	5	5	4	1	7	5	5	1	7	5	7	5	6	2	Yes. The story was straight forward and the questions correlated extremely well with what the story was asking.	The survey was very liked by me.		7		2	1	1		1	1	5.67	3.67	6	5.17	5.67	5.67
R_6MdG7FxiUawIivr	7	1	1	1	7	1	3	7	6	2	6	6	6	2	6	7	6	7	6	5	4	1	7	4	6	2	6	5	5	5	7	1	Yes definitely. The questions were straight forward and clear in what they were asking.			7		2	1	1		1	1	6.33	6	6.67	5.33	5	5
R_ac4Aj7s0Tpnvyjb	7	1	1	1	7	1	3	6	3	2	6	3	3	5	3	6	6	5	5	6	6	1	7	6	6	1	7	6	6	6	4	4	Yes these instructions were very easy to follow. Reading a short paragraph and then responding to questions is not that hard.	No	Dan is a cool dude.	7		2	1	1		1	1	5	3	5.67	6	6	6
R_1TfGmF8kcX4icMB	7	1	1	1	7	1	3	7	7	1	7	5	6	2	6	6	7	5	5	7	7	1	7	6	6	1	7	7	7	5	7	2	Yes.	It may have been nice to have been reminded of the scenario or at least parts of it. But for the most part the questions were easy to answer based on the vignette.		7		1	1	1		1	1	7	5.67	6	6.33	6.33	6.33
R_1Nr4FQT5BISkqwt	7	1	1	1	7	1	3	7	6	2	6	5	6	2	6	7	6	5	7	7	7	1	7	5	6	7	1	7	7	7	6	2	Yes. The questions were simply worded and I did not have a hard time understanding what I needed to do.	No.	No.	7		1	1	1		1	1	6.33	5.67	6	6.5	7	7
R_0lj8EjEHNvFz47H	7	1	1	1	7	1	3	5	3	6	2	2	2	7	1	2	1	1	6	6	6	2	6	5	5	2	6	5	7	6	1	7	yes			7		2	1	1		1	1	3.33	1.67	1.33	5.67	6	6
R_0IlEhTX1ZDcPOeh	7	1	1	1	7	1	3	7	2	6	2	6	6	1	7	7	7	7	7	7	7	1	7	7	7	1	7	7	7	7	6	4	Yes. None of the questions were tricky, they were straight forward.	I have none.	No.	7		2	1	1		1	1	3.67	6.33	7	7	7	7
R_2cvyLqElmbjLKhn	1	0	1	1	7	1	2	7	6	2	6	5	4	3	5	6	6	6	6	6	7	1	7	6	6	1	7	5	6	6	5	2	Yes, very easy to complete!		Most interesting study I've partaken in.	7		1	1	1		1	1	6.33	4.67	6	6.33	5.67	5.67
R_4JEEHqtWJ2bMz6l	7	1	1	1	7	1	3	6	3	5	3	3	5	5	3	4	4	2	6	6	6	2	6	4	4	1	7	5	6	5	5	2	Yes, the questions were guided and simple to answer			1		2	1	1		1	1	4	3.67	3.33	5.33	5.33	5.33
R_4MFbKpNSIn7aYW9	7	1	1	1	7	1	3	6	2	2	6	6	5	2	6	4	3	3	5	4	4	2	6	4	4	1	7	5	7	6	5	4	Yes. The approach was clear, and I easily understood what was being asked of me.	I thought the survey was well made. The length was reasonable, and the built in "check" questions are helpful for the researcher.	I enjoyed the study as a whole, and I would be interested in seeing what the results of the research are.	7		2	1	1		1	1	4.67	5.67	3.33	4.5	6	6
R_8jeqTHfS9KiY7qt	4	0	1	1	7	1	2	7	7	1	7	6	6	1	7	6	6	5	6	6	6	2	6	5	5	1	7	7	7	7	6	4	All of the instructions were all pretty straight forward except for the questions that wanted me to select an answer that was given.	I don't have any suggestions to improve the survey.	I don't have any other comments regarding this study.	8		2	1	1		1	1	7	6.33	5.67	5.67	7	7
R_a4RXQehp9BTh19b	7	1	1	1	7	1	3	7	5	3	5	3	3	5	3	6	5	5	7	7	7	1	7	7	7	1	7	5	6	6	6	2	Yes, I was always told exactly what to do.			7		1	1	1		1	1	5.67	3	5.33	7	5.67	5.67
R_bsftmI5tDpBqPbL	7	1	1	1	7	1	3	7	7	1	7	5	5	2	6	7	7	7	5	5	6	1	7	6	6	1	7	7	5	5	6	2	Yes.	No.	No.	8		1	1	1		1	1	7	5.33	7	5.83	5.67	5.67
R_d4mrGalNwxDFLJr	7	1	1	1	7	1	3	4	3	5	3	4	4	1	7	6	5	5	7	7	7	1	7	6	6	1	7	6	7	7	5	2	Yes, pretty easy to follow.	Some of the questions didn't have answers I wanted. Such as Dan's masculinity. I don't think the scenario tells me if he is masculine or feminine. I don't know Dan as a real person so I cant judge that.	Nope	7		1	1	1		1	1	3.33	5	5.33	6.67	6.67	6.67
R_6Wfpyu6AW6YR2i9	7	1	1	1	7	1	3	6	5	1	7	5	5	2	6	6	7	6	5	7	6	2	6	6	5	1	7	5	4	5	5	2	Yes.			7		2	1	1		1	1	6	5.33	6.33	5.83	4.67	4.67
R_2ivjQ2Ddas1eB2l	7	1	1	1	7	1	3	7	7	1	7	5	5			6	6	6	6	6	6	1	7	6	6	1	7	5	6	6	5	2	Yes they were very easy to understand and concise.	I have no suggestions for improving the survey.	No	7		2	1	1		1	1	7		6	6.17	5.67	5.67
R_03d6s9pOYT1Q42F	7	1	1	1	7	1	3	7	7	1	7	2	2	6	2	4	4	2	5	5	4	2	6	5	5	1	7	5	7	3	3	3	yes, very simple			7		2	1	1		1	1	7	2	3.33	5	5	5
R_eVSUHGFFjroTg9L	7	1	1	1	7	1	3	7	7	1	7	1	1	6	2	7	7	7	7	7	6	2	6	7	7	1	7	6	7	6	5	2	Yes they were easy to follow.	N/A	I thought the "please select this answer" questions were awkward.	1		2	1	1		1	1	7	1.33	7	6.67	6.33	6.33
R_1IfruldMwfFA0YJ	7	1	1	1	7	1	3	7	6	2	6	5	4	2	6	6	5	4	3	6	5	2	6	5	6	1	7	4	4	5	7	1	All of the instructions were well thought and easy to follow.			7		2	1	1		1	1	6.33	5	5	5.17	4.33	4.33
R_0rCAR4QbxEJM88B	7	1	1	1	7	1	3	6	6	1	7	4	3	5	3	5	5	5	5	6	6	2	6	7	6	1	7	5	7	5	5	1	All questions were easy to follow.	I don't think that we can glean a lot about Dan based on the information we were given, for instance i really had no way to know if Dan is nice or warm. To use an example of a fictional fireman, he could be like Tommy from 'Rescue Me', a complete bastard o other adults, but with a child so the sight of a child in pain deeply upset him. there are too many variables in a person's personality to gue…	see suggestions	7		2	1	1		1	1	6.33	3.33	5	6	5.67	5.67
R_1CfaCcp4MrByRHD	7	1	1	1	7	1	3	5	5	2	6	4	5	4	4	6	6	6	6	6	6	1	7	4	5	1	7	4	5	4	5	2	Yeah, pretty straight forward.	Not really	It was...something	7		2	1	1		1	1	5.33	4.33	6	5.67	4.33	4.33
R_1NVV2F65TjAjtKB	1	0	1	1	7	1	2	7	7	1	7	5	5	2	6	5	5	5	6	6	6	1	7	7	7	1	7	6	6	6	6	2	Yes,they were direct and to the point.			7		1	1	1		1	1	7	5.33	5	6.5	6	6
R_dpaCWwWTPexve1T	7	1	1	1	7	1	3	7	5	2	6	5	5	3	5	6	6	5	7	7	7	1	7	7	7	1	7	7	7	7	6	1	Yes, the article didn't really give enough information for some of the questions though		I understood that this was trying to see if we viewed men crying as un-manly and how gender roles affect our opinions.	7		1	1	1		1	1	6	5	5.67	7	7	7
R_7891ZX9QiFjmi4B	7	1	1	1	7	1	3	6	6	2	6	4	4	2	6	5	5	5	5	5	5	1	7	5	5	1	7	6	5	5	5	2	Yes--very clear, I had no issues at all	No	No	7		1	1	1		1	1	6	4.67	5	5.33	5.33	5.33
R_3DhleNe9YljIUnz	7	1	1	1	7	1	3	7	7	1	7	5	4	4	4	7	7	6	6	6	7	1	7	6	6	1	7	3	6	6	6	3	Yes they were very clear to follow. There were no trick questions or anything asked that I did not understand.			7		1	1	1		1	1	7	4.33	6.67	6.33	5	5
R_1IfatYA4itiT77L	7	1	1	1	7	1	3	7	7	1	7	6	6	1	7	7	6	6	6	7	7	1	7	7	7	1	7	6	7	6	6	2	Yes	You could provide a few different scenarios instead of just one to get a better sample of people's responses.	No	7		1	1	1		1	1	7	6.33	6.33	6.83	6.33	6.33
R_5dUuAqmvlVrYPgF	7	1	1	1	7	1	3	6	6	1	7	5	5	2	6	7	6	5	6	7	6	1	7	6	6	1	7	6	7	6	6	4	Yes, I knew exactly what I needed to do.	N/A	N/A	2		1	1	1		1	1	6.33	5.33	6	6.33	6.33	6.33
R_6tJ72W2Y3NZ1MgZ	7	1	1	1	7	1	3	7	6	2	6	4	4	3	5	5	7	5	5	7	6	1	7	5	6	1	7	5	6	6	5	4	Yes. I understood everything.	There were a few questions I had to read twice to fully understand them, but there are no big things that have to be changed.	Nope.	1		1	1	1		1	1	6.33	4.33	5.67	6	5.67	5.67
R_5nbWbWN8r2daTXv	7	1	1	1	7	1	3	7	7	1	7	6	5	2	6	7	6	5	5	4	6	1	7	4	5	1	7	7	7	6	5	3	Yes. The instructions were clear, concise, and not wordy or hard to understand.			7		2	1	1		1	1	7	5.67	6	5.17	6.67	6.67
R_9RFJPwsARpv2iwZ	7	1	1	1	7	1	3	7	6	2	6	6	5	2	6	6	7	6	7	7	7	1	7	7	7	1	7	7	7	7	4	1	Yes, everything was straightforward and direct. The story was clear and entertaining therefore it was easy to refer back to it and answer the questions.	I have no suggestions for improving the survey.	Maybe add more to the story so it's not as short.	7		1	1	1		1	1	6.33	5.67	6.33	7	7	7
R_ehCVoEpPeqBvUdD	7	1	1	1	7	1	3	7	7	1	7	6	6	1	7	7	6	5	7	7	7	1	7	6	6	1	7	7	7	7	6	1	Yes.	Providing an operational definition for "strong" and "tough".	n/a	8		1	1	1		1	1	7	6.33	6	6.67	7	7
R_cMeUbUY0EeMYff7	7	1	1	1	7	1	3	7	3	5	3	4	4	4	4	6	6	6	6	6	6	1	7	7	7	1	7	4	6	5	3	6	Yes the instruction were very easy to follow and told me exactly what i had to do	No i dont have any suggestions	No i do not have any comments regarding this study	7		2	1	1		1	1	4.33	4	6	6.5	5	5
R_1GqfANb6fNn04Sh	7	1	1	1	7	1	3	6	6	3	5	5	6	4	4	6	6	5	6	6	5	1	7	6	6	1	7	6	5	6	6	2	Yes			7		2	1	1		1	1	5.67	5	5.67	6	5.67	5.67
R_eXJp2l0kSMYjWMl	7	1	1	1	7	1	3	4	3	5	3	3	3	5	3	5	4	4	6	6	6	2	6	5	6	2	6	5	6	6	4	4	Very easy to follow, i didn't spend too much time trying to understand the question.	No idea.	Nope.	1		2	1	1		1	1	3.33	3	4.33	5.83	5.67	5.67
R_bdCPZLb7AKoxNWZ	7	1	1	1	7	1	3	6	6	2	6	5	5	2	6	6	6	5	5	4	6	2	6	4	6	1	7	6	4	4	6	3	Yes they were easy to follow, however it would have been beneficial to be able to go back and look at the story for any minor missed details/	Ability to revisit the prompt, list of emotions more related to his job than "trust-worthy" for example	N/A	7		2	1	1		1	1	6	5.33	5.67	5.17	4.67	4.67
R_6D6oxzgv0zsJztX	7	1	1	1	7	1	3	7	6	3	5	4	5	1	7	7	6	5	6	7	5	2	6	4	5	1	7	5	6	4	6	2	I believe everything had been instructed clearly and thoroughly. I did not have any trouble with the directions.	I think that the survey is perfectly satisfactory, it isn't too long and is easy to follow.	I do not have any further comments at this time.	7		2	1	1		1	1	6	5.33	6	5.5	5	5
R_5nV89H9G2SFOx01	7	1	1	1	7	1	3	7	6	1	7	4	3	5	3	4	4	4	4	6	5	3	5	4	4	6	2	6	7	4	4	4	Yes, all of the instructions were easy to follow.	I think that when choosing numbers to measure something (1-7), I think that 4 should be labeled as a neutral option.	I do not have any other comments regarding this study.	7		2	1	1		1	1	6.67	3.33	4	4.67	5.67	5.67
R_bjenIMbe8GSSxX7	7	1	1	1	7	1	3	6	7	2	6	7	7	1	7	7	7	6	6	6	7	1	7	6	6	7	1	6	6	7	7	3	Instructions were very clear and easy to follow.	N/A	N/A	7		2	1	1		1	1	6.33	7	6.67	6.33	6.33	6.33
R_9RCIBvYeUTrUmEJ	7	1	1	1	7	1	3	6	2	6	2	5	5	2	6	6	6	4	5	4	4	3	5	5	4	1	7	4	6	6	5	1	yes	no	no	7		2	1	1		1	1	3.33	5.33	5.33	4.5	5.33	5.33
R_eez0IYpwlitXapn	7	1	1	1	7	1	3	3	3	5	3	4	4	4	4	5	4	4	5	4	5	1	7	5	5	1	7	5	7	5	4	4	Yes, the wording was clear and easy to comprehend.	N/A	N/A	7		1	1	1		0	0	3	4	4.33	5.17	5.67	5.67
R_9Nqdj4KWboEGzw9	7	1	1	1	7	1	3	6	6	2	6	3	3	5	3	5	5	4	7	7	7	1	7	7	7	1	7	7	7	7	2	6	They were. Everything was laid out well.	No	No	7		2	1	1		0	0	6	3	4.67	7	7	7
R_6PsdZYdfmKyQ6CV	7	1	1	1	7	1	3	3	2	6	2	3	3	4	4	5	6	4	7	6	6	1	7	6	6	1	7	5	6	6	3	6	Yes, it directly stated what I needed to do and how to answer the question based on the situation. I had no problem understanding the instructions.	No.	No.	7		1	1	1		0	0	2.33	3.33	5	6.33	5.67	5.67
R_71dMir5fmJdpKxD	7	1	1	1	7	1	3	7	7	1	7	3	2	4	4	5	5	4	7	7	7	1	7	7	7	1	7	7	7	7	1	6	Yes, everything was self-explanatory.	You could tell us that the story about Jessica would be the only story we would be focusing on in this survey so that we read it over a few times and really get to know it.	No.	7		1	1	1		0	0	7	3	4.67	7	7	7
R_bfkGq22Dvn4Qu3j	7	1	1	1	7	1	3	3	6	5	3	3	3	4	4	3	5	4	5	5	5	1	7	5	5	1	7	5	7	5	3	5	Yes. Each of the questions were well thought out, and they kept me interested in the survey.	Maybe include a Jessica who doesn't cry, or a man that does. Or a continuation showing what her crying does to the rest of the nurses/doctors/etc.	No.	7		1	1	1		0	0	4	3.33	4	5.33	5.67	5.67
R_5BTXjvjXHn8bRkh	7	1	1	1	7	1	3	6	6	2	6	6	6	6	2	7	6	6	6	6	6	1	7	6	6	1	7	6	5	6	2	5	Yes. Your instructions were very thorough and easy to understand	One of questions asking about is firefighting seen as a masculine occupation, I was not able to click" 7 for extremely." I don't know if that was a technical error or done on purpose.	No I do not.	2		1	1	1		0	0	6	4.67	6.33	6.17	5.67	5.67
R_8ICfIPm5iktLPrn	1	0	1	1	7	1	2	6	6	2	6	5	5	2	6	7	7	5	7	7	6	2	6	5	5	1	7	6	7	7	3	5	Yes, all of the instructions were clear and easy to follow. I was able to easily read and understand all of the instructions and then know how to respond accordingly.	I have no suggestions for improving the survey at this time.	No comments at this time.	7		1	1	1		0	0	6	5.33	6.33	6	6.67	6.67
R_7WDRKtFR8vI3teB	7	1	1	1	7	1	3	7	5	2	6	5	5	2	6	6	7	4	6	6	7	1	7		6	1	7	5	6	6	3	5	Yes the story and instructions were clear	no it was pretty simple		7		1	1	1		0	0	6	5.33	5.67		5.67	5.67
R_e3bdqyQaIi7TE4R	7	1	1	1	7	1	3	7	7	1	7	7	7	1	7	7	7	7	7	7	7	1	7	7	7	1	7	7	7	7	1	7	Yes.			7		1	1	1		0	0	7	7	7	7	7	7
R_bvclT6X6QLFadb7	7	1	1	1	7	1	3	5	5	4	4	4	3	4	4	4	4	3	6	6	6	1	7	6	5	1	7	6	5	5	4	4	Yes, I had no trouble.		I think I put 6 when the question asked me to put 7 but I swear I answered all questions honestly.	7		1	1	1		0	0	4.67	3.67	3.67	6	5.33	5.33
R_6PQV4pKzRN62Dfn	7	1	7	0	7	1	2	6	5	2	6	6	5	3	5	5	5	4	5	5	5	1	7	5	5	1	7	5	6	5	1	6	Yes. They were very straight-forward.	Yes, indicate that the excerpt which was presented at the beginning of the survey will be the basis of information for the rest of the survey so people take what they're reading more seriously.	No	7		1	1	1		0	0	5.67	5.33	4.67	5.33	5.33	5.33
R_6Q2mtuIH25u3nIp	7	1	1	1	7	1	3	6	5	5	3	6	6	2	6	6	6	6	6	6	6	1	7	6	6	1	7	6	6	6	2	6	Yes, every instruction was succinct yet to the point. I felt that I understood everything.			1		1	1	1		0	0	4.67	6	6	6.17	6	6
R_8evX2JeSbHWQPcN		1	1	1	7	1	3	7	7	2	6	2	4	6	2	6	6	6	6	6	6	1	7	4	6	1	7	6	7	6	1	7	Yes, I was able to read and understand the scenario. As well as give feedback on my opinion of the characters reactions.	No	No	2		1	1	1		0	0	6.67	2.67	6	5.83	6.33	6.33
R_80TSvtvEZWBqarj	7	1	1	1	7	1	3	5	3	1	7	5	5	2	6	5	3	3	7	7	7	1	7	7	7	1	7	7	7	7	2	5	Yes they were clear and easy.	No	No	7		1	1	1		0	0	5	5.33	3.67	7	7	7
R_cZK8stieFEfUJxz	7	1	1	1	7	1	3	7	7	1	7	7	5	1	7	7	7	7	7	7	7	1	7	7	7	1	7	7	7	7	1	7	Yes, the instructions were clear and easy to understand.	A lot of the questions asked about Jessica weren't really answered by that small vignette. We need more information about her character to make the judgments the survey was asking us to make.	No	7		2	1	1		0	0	7	6.33	7	7	7	7
R_3wSFoJi1wiTma4B	7	1	1	1	7	1	3	7	5	4	4	4	3	2	6	6	7	5	6	7	7	1	7	6	6	1	7	7	5	6	3	5	Yes. I could comprehend all of the questions that were asked of me.			7		1	1	1		0	0	5.33	4.33	6	6.5	6	6
R_4YMlxUjF2FaErHL	7	1	1	1	7	1	3	5	3	6	2	5	6	3	5	5	5	3	5	7	7	1	7	7	6	1	7	5	7	6	2	5	Yes, the wording made the questions clear to understand	no	I liked how questions about which selection to make were added in to catch the people who do not read them	7		2	1	1		0	0	3.33	5.33	4.33	6.5	6	6
R_8kS9moGAGo05rTL	7	1	1	1	7	1	3	6	6	2	6	4	3	3	5	7	6	4	7	7	7	1	7	6	7	1	7	6	5	7	5	4	Yes, all i needed to do was read, everything was very clear.	No.	No.	7		2	1	1		0	0	6	4	5.67	6.83	6	6
R_9LENFbLjD5kiVFz	1	0	4	0	6	0	0	6	3	4	4	5	6	4	4	7	6	5	6	6	6	6	2	6	6	1	7	7	4	6	4	6	Some of them were clear to follow but don't be throwing in somethings like please select this because that can cause you info to be un biased	no	no	7		2	1	1		0	0	4.33	5	6	5.33	5.67	5.67
R_8BKiHLTTRClxZxb	7	1	1	1	7	1	3	7	7	1	7	4	4	5	3	6	6	5	7	7	7	1	7	7	7	1	7	7	6	7	3	5	Yes, I was not confused about any question on how it was worded.	Include another scenario to obtain more accurate results.	Made me realize that I stereotype certain jobs and who normally works them.	7		1	1	1		0	0	7	3.67	5.67	7	6.67	6.67
R_6ED1FjrhVnB9YuF	7	1	1	1	7	1	3	7	7	1	7	5	5	3	5	6	6	6	7	7	7	1	7	7	7	1	7	7	7	7	1	7	Yes, messed up on her occupation though.. :/	Nope thought it was good, short, and definitely made me think about how we view some jobs as masculine/feminine even though there is no reason why both genders can't do one or the other.	not at this time	7		2	1	1		0	0	7	5	6	7	7	7
R_6ShtoYvf73GBuD3	7	1	1	1	7	1	3	6	6	2	6	4	4	3	5	5	5	4	6	6	6	1	7	6	7	1	7	6	4	7	3	5	Yes the instructions were easy to understand and I had no problem understanding what was being asked of me	I would suggest making the open ended question at the beginning a little more specific or rewording it a tad.	No I do not.	7		2	1	1		0	0	6	4.33	4.67	6.33	5.67	5.67
R_bPjqKNvvJxa0IKN	7	1	1	1	7	1	3	6	6	2	6	5	3	3	5	5	5	4	7	7	7	1	7	6	7	1	7	7	7	7	3	6	Yes. It was very straightforward, every question was easy to answer.	The only qualm I had was rating Jessica's personality, mostly because I feel like I was making assumptions based on a short vignette, as opposed to seeing how she reacted in different situations.	Overall, it was interesting and I believe it can get some good opinions and results.	7		2	1	1		0	0	6	4.33	4.67	6.83	7	7
R_eeNw82ohF65FTyB	7	1	1	1	7	1	3	5	3	3	5	5	3	5	3	6	4	4	4	5	6	2	6	5	5	1	7	5	5	5	2	6	Yes, no complaints	Maybe say that all questions will refer to the story so that the participant knows its extremely important to take in all detail.	Very to the point	7		2	1	1		0	0	4.33	3.67	4.67	5.17	5	5
R_4Njgli7hilrIuWh	7	1	1	1	7	1	3	6	5	3	5	4	3	5	3	5	6	5	5	5	5	1	7	6	6	1	7	5	6	5	2	5	Yes, they were stated plainly.			8		2	1	1		0	0	5.33	3.33	5.33	5.67	5.33	5.33
R_0TngsHZKNBRQHGt	7	1	1	1	7	1	3	5	5	5	3	5	5	4	4	6	5	5	6	6	6	2	6	4	5	2	6	6	6	6	2	5	Yes, the instructions were very easy to follow. The questions were straight-forward and easy to understand.		As a male nursing major, I can certainly say that the field is viewed by the general population as a feminine occupation. It is different today than it was in the past, however, it is still seen as a "woman's job".	7		2	1	1		0	0	4.33	4.67	5.33	5.5	6	6
R_9Ep91wlaAxNP73n	1	0	1	1	7	1	2	2	3	3	5	2	2			3	4	2	6	6	6	1	7	2	6	1	7	7	6	6	1	7	yes very straight foward	no very clear and concise. Smart survey.		7		2	1	1		0	0	3.33		3	5.5	6.33	6.33
R_5yUkHgpDESAW7Rz	7	1	1	1	7	1	3	7	6	1	7	5	2	4	4	6	6	5	7	6	6	1	7	5	5	1	7	6	7	7	2	6	Yes, all the question were very detailed and thorough	None, great survey	N/A	1		2	1	1		0	0	6.67	3.67	5.67	6	6.67	6.67
R_2o7OFtTH6li0qKV	7	1	1	1	7	1	3	7	6	3	5	4	4	3	5	5	5	4	6	6	6	1	7	6	6	1	7	6	7	6	3	6	Yes, they stated exactly what they wanted and how you should answer the questions.	I really liked the scenario. It appealed to what I want to do with my career so I felt included in the scenario.	I liked this study.	7		1	1	1		0	0	6	4.33	4.67	6.17	6.33	6.33
R_6XrGRjqYmUSFbqR	7	1	1	1	7	1	3	7	7	2	6	5	5	2	6	4	4	4	4	4	4	4	4	4	4	2	6	4	6	4	4	5	Yes. They were clear and concise.			7		2	1	1		0	0	6.67	5.33	4	4	4.67	4.67
R_cMXX8bErqPVpSx7	7	1	1	1	7	1	3	7	6	4	4	4	4	4	4	7	7	7	7	7	7	1	7	6	7	1	7	7	7	7	1	7	yes			7		1	1	1		0	0	5.67	4	7	6.83	7	7
R_ePba5JonrTHK3Yh	7	1	1	1	7	1	3	6	3	5	3	3	3	5	3	3	2	2	6	6	6	1	7	6	7	1	7	4	6	5	1	7	yes	no	no	7		2	1	1		0	0	4	3	2.33	6.33	5	5
R_7X4bJwzvoHG7Q3P	4	0	1	1	7	1	2	5	7	4	4	4	4	5	3	7	3	3	7	7	7	1	7	7	7	7	1	7	7	7	5	7	Yes they were clear	No suggestions	I am a nursing student so I connected with the survey	3		1	1	1		0	0	5.33	3.67	4.33	7	7	7
R_3f1Qc9KpbRAEo17	7	1	1	1	7	1	3	5	2	6	2	3	3	5	3	4	3	3	6	6	6	2	6	4	5	6	2	6	6	6	2	6	Yes, they were simple questions overall although I thought some were very opinion based and some could not be accurately answered with the provided information.			7		2	1	1		0	0	3	3	3.33	5.5	6	6
R_a9kYvaBg5MQQ8Kx	7	1	1	1	7	1	3	4	5	4	4	5	5	4	4	4	4	3	4	4	4	2	6	4	4	1	7	3	4	3	2	4	Yes, there's was never a time that I felt confused by a statement.		I thought interweaving the "Please Do This" statements was funny but a smart way of probably ensuring people are paying attention to the survey and not filling in random answers. I also think having one short response question was an interesting aspect, gtting a more individualized answer from survey takers while being able to compare them for patterns or overlaps at the same time.	7		2	1	1		0	0	4.33	4.67	3.67	4.33	3.33	3.33
R_0UpzLu3m0BFmVWl	7	1	1	1	7	1	3	6	6	4	4	4	4	4	4	4	5	5	5	6	6	1	7	4	5	1	7	6	6	5	3	6	Yes	No	No	7		2	1	1		0	0	5.33	4	4.67	5.5	5.67	5.67
R_bBH1GYRRx5uFfq5	7	1	1	1	7	1	3	6	5	3	5	6	6	2	6	6	6	5	6	5	5	4	4	4	5	2	6	5	6	5	2	6	Yes. Instructions were easy to follow			7		2	1	1		0	0	5.33	6	5.67	4.83	5.33	5.33
R_42QIA2M1Cx3NTAF	7	1	1	1	7	1	3	7	7	1	7	2	2	6	2	6	6	5	5	6	7	1	7	6	7	1	7	6	7	4	2	6	Yes, everything was very straight-forward.	No	No	7		2	1	1		0	0	7	2	5.67	6.33	5.67	5.67
R_eR2QqcFXa2TZ2Rv	7	1	1	1	7	1	3	5	3	5	3	3	2	5	3	4	4	4	7	6	6	1	7	5	7	1	7	7	7	7	1	7	Yes, everything was pretty straight forward.	At the start identify that reading the first paragraph is very important and to read it a couple times carefully.	no	7		2	1	1		0	0	3.67	2.67	4	6.33	7	7
R_9Ep8lZpKNBwTOn3	7	1	1	1	7	1	3	6	6	2	6	3	3	5	3	4	5	5	6	6	5	2	6	5	6	1	7	5	5	6	4	5	Yes, they all made sense and were simple.	No.	No.	2		2	1	1		0	0	6	3	4.67	5.67	5.33	5.33
R_1Cf4bZp7pDlyprT	7	1	1	1	7	1	3	6	6	2	6	6	6	1	7	6	6	5	6	6	7	1	7	7	7	1	7	6	5	6	3	5	Yes very.	None.	I was thrown off by the questions asking to select a specific answer.	7		2	1	1		0	0	6	6.33	5.67	6.67	5.67	5.67
R_0PrFtctP9ODcNwN	7	1	1	1	7	1	3	6	5	3	5	3	3	4	4	5	5	3	5	6	6	1	7	4	6	1	7	5	5	5	3	5	Yes			7		2	1	1		0	0	5.33	3.33	4.33	5.67	5	5
R_cBmanWXK1vTxIIB	7	1	1	1	7	1	3	6	6	2	6	4	2	4	4	5	6	4	7	7	7	1	7	6	7	1	7	6	7	6	2	6	Yes, they were pretty straight forward questions			7		2	1	1		0	0	6	3.33	5	6.83	6.33	6.33
R_0qdt6mjVQ6K4AxT	7	1	1	1	7	1	3	7	6	2	6	4	4	5	3	6	5	5	6	7	7	1	7	7	7	1	7	6	7	7	1	7	yes. everything was easy to understand and written out clearly			7		1	1	1		0	0	6.33	3.67	5.33	6.83	6.67	6.67
R_b1MmdlCLYubPVY1	4	0	5	0	6	0	0	4	4	4	4	1	3	3	5	4	5	2	5	3	2	3	5	5	4	3	5	5	6	5	1	6	Yes	No	No	7		1	1	1		0	0	4	3	3.67	4	5.33	5.33
R_eDkbLJubviBEXKB	7	1	1	1	7	1	3	5	3	2	6	5	3	5	3	6	6	5	7	7	7	1	7	7	7	1	7	7	7	7	2	6	Yes, all of the instructions were clear.	No suggestions		7		1	1	1		0	0	4.67	3.67	5.67	7	7	7
R_ebpQnX3AYGhz4Pz	7	1	1	1	7	1	3	7	7	1	7	6	6	2	6	7	7	7	7	7	7	1	7	7	7	1	7	7	7	7	2	6	Yes all of the instructions were clear and easy to follow.	I would add another situation and another set of questions for that situation.	No I have no other comments.	7		1	1	1		0	0	7	6	7	7	7	7
R_bEOXrjtmRedQMIJ	7	1	1	1	7	1	3	6	6	2	6	6	6	2	6	5	5	3	5	5	5	2	6	4	5	1	7	5	7	5	1	7	Yes. I thought all of the instructions were clear.			7		2	1	1		0	0	6	6	4.33	5	5.67	5.67
R_5olQH4jSCDJxLtr	7	1	1	1	7	1	3	6	6	2	6	4	4	2	6	5	3	2	4	5	5	1	7	4	4	1	7	5	5	4	2	5	Yes. I thought that they were very easy and clear.	I would suggest making the original piece that was read longer so we could gather more information on Jessica in order to better assess her traits.	No.	7		2	1	1		0	0	6	4.67	3.33	4.83	4.67	4.67
R_0PzBetftzilvPFP	7	1	1	1	7	1	3	6	6	2	6	4	3	5	3	6	6	5	4	5		2	6	4	5	2	6	4	6	5	3	6	Yes, I understood what to do and all of the questions were based fairly on the prompt.	No...	Thanks for letting me participate!	7		2	1	1		0	0	6	3.33	5.67		5	5
R_9KUjFOuqID4oYId	7	1	1	1	7	1	3	7	7	1	7	6	6	2	6	6	6	5	7	7	7	1	7	7	7	1	7	7	7	7	2	6	Yes, they were straightforward questions that were easy to understand.	No, I have no suggestions.	No	7		1	1	1		0	0	7	6	5.67	7	7	7
R_0GspXAOnIZh8RMx	7	1	1	1	7	1	3	7	4	4	4	2	3	6	2	4	1	1	6	6	6	1	7	7	7	1	7	4	7	5	1	7	Yes they were. I did want to reevaluate my short answer as I went on throughout the survey.	No	No	3		1	1	1		0	0	5	2.33	2	6.5	5.33	5.33
R_9t4QL1u0ouXDaGV	7	1	1	1	7	1	3	5	3	5	3	4	3	4	4	6	5	3	7	7	7	1	7	7	7	1	7	7	7	7	2	6	Yes, they were all very clear.	No	No	7		1	1	1		0	0	3.67	3.67	4.67	7	7	7
R_eD48qXJyRmgH5oV	7	1	1	1	7	1	3	7	7	2	6	4	4	4	4	5	5	5	5	5	5	2	6	6	6	1	7	6	6	5	2	6	Yes, all I had to do was select a number that corresponded to the answer that I felt was most appropriate.	Not sure if this goes against what the survey is about, but maybe include a bit more detail about Jessica to make peoples answers more accurate.		7		1	1	1		0	0	6.67	4	5	5.5	5.67	5.67
R_3scWKk7a32TgZAF	7	1	1	1	7	1	3	7	7	1	7	7	3	1	7	7	6	6	6	5	7	1	7	6	6	1	7	6	4	5	1	6	Yes, they were all clear.			7		1	1	1		0	0	7	5.67	6.33	6.17	5	5
R_6ytmUhZCXlSNhoV	7	1	1	1	7	1	3	7	7	1	7	4	5	3	5	6	6	6	7	7	7	1	7	7	7	1	7	7	7	7	1	7	Yes, the instructions were clear.	No further suggestions.	Interesting study.	7		1	1	1		0	0	7	4.67	6	7	7	7
R_eQEgNut1doyoiod	7	1	1	1	7	1	3	6	3	4	4	5	3	5	3	5	4	4	6	6	6	1	7	6	6	1	7	6	7	6	1	6	Yes they were easy to follow.	I do not have any suggestions.	No I do not.	7		1	1	1		0	0	4.33	3.67	4.33	6.17	6.33	6.33
R_9smPA0Pe2Rt5W3r	7	1	1	1	7	1	3	7	6	1	7	4	3	4	4	5	3	2	7	7	7	1	7	6	7	1	7	6	7	7	1	7	Yes, however, it was hard to choose adjectives about Jessica judging only from one situation.			7		1	1	1		0	0	6.67	3.67	3.33	6.83	6.67	6.67
R_9ZXxr8lLG2jJ4fb	7	1	1	1	7	1	3	5	6	2	6	3	4	5	3	5	3	3	2	4	5	1	7	3	5	1	7	6	4	5	4	4	Yes, I thought all questions were explicit in what they were asking. This study had a clear message and operational definition.			7		1	1	1		0	0	5.67	3.33	3.67	4.33	5	5
R_57t6pt7BxGix5HL	7	1	1	1	7	1	3	7	6	1	7	5	6	2	6	6	6	5	7	7	7	2	6	5	6	1	7	7	7	7	2	6	Yes, the instructions were very clear cut and detailed. They informed me of everything I needed to do in the simplest way possible.			7		1	1	1		0	0	6.67	5.67	5.67	6.33	7	7
R_0fcEH4dP7Q3KHBz	7	1	1	1	7	1	3	7	7	1	7	5	5	2	6	6	6	6	6	6	6	1	7	5	6	1	7	6	6	6	1	6	Yes, the instructions were very straightforward.			7		1	1	1		0	0	7	5.33	6	6	6	6
R_0defM79zzeSNeE5	7	1	1	1	7	1	3	6	7	1	7	3	3	5	3	4	6	4	6	4	5	1	7	5	5	1	7	6	7	5	3	5	All instructions were easy to follow. It was very clear where to put your answer to everything.	Instead of making the questions with the numbers 1-7 have only 1 and 7 listed as an option, define 4 as a variable as well. For example, for the masculinity of a firefighter question, instead of saying 1 is "not at all" and 7 is "very masculine", have 4 lsted as a neutral, such as "unisex".	N/A	7		2	1	1		1	0	6.67	3	4.67	5.33	6	6
R_5gr1JqutN6P6ckZ	7	1	1	1	7	1	3	7	6	2	6	6	6	3	5	6	6	5	6	5	6	1	7	6	6	1	7	6	5	5	4	3	yes, the instructions were perfectly clear			7		1	1	1		1	0	6.33	5.67	5.67	6	5.33	5.33
R_7WFAPADzsQRINDv	7	1	1	1	7	1	3	7	7	1	7	5	5	3	5	5	5	4	5	7	7	1	7	7	7	1	7	7	5	7	4	4	Yes. All questions were straight forward and easy to follow.			7		1	1	1		1	0	7	5	4.67	6.67	6.33	6.33
R_6WpDvhlroxRxoOx	7	1	1	1	7	1	3	7	5	2	6	5	3	2	6	4	4	3	6	6	6	1	7	5	6	1	7	6	7	6	5	2	Yes, the questions were straightforward and the meaning was clear.	N/A	N/A	7		1	1	1		1	0	6	4.67	3.67	6	6.33	6.33
R_0Usvg4ntUWpw9GB	7	1	1	1	7	1	3	5	3	5	3	4	3	4	4	4	3	3	4	4	4	4	4	4	4	2	6	4	5	4	4	4	The instructions were very clear and I followed them easily. I understood what I was supposed to do.	I have no suggestions.	I have no comments.	7		1	1	1		1	0	3.67	3.67	3.33	4	4.33	4.33
R_aVi9VKhSopujOKN	7	1	1	1	7	1	3	7	1	1	7	7	3	5	3	7	6	4	6	6	6	1	7	6	6	1	7	6	6	6	6	2	Yes, everything made sense.	N/A	N/A	7		1	1	1		1	0	5	4.33	5.67	6.17	6	6
R_8jj6KstxxxneKsB	7	1	1	1	7	1	3	6	6	2	6	3	3	3	5	3	3	3	4	4	7	4	4	6	6	1	7	4	7	4	6	2	Yes, there didn't seem to be any trick questions.			7		1	1	1		1	0	6	3.67	3	5.17	5	5
R_eQY01I6J4WBOoRf	7	1	1	1	7	1	3	6	2	6	2	2	2	6	2	5	3	2	7	7	7	1	7	7	7	1	7	7	7	7	5	3	Yes. I understood what was asked in every question.	No.	No.	7		1	1	1		1	0	3.33	2	3.33	7	7	7
R_0VTH2s7y1S7pIH3	7	1	1	1	7	1	3	5	4	2	6	4	4	4	4	2	4	4	4	4	4	1	7	3	5	3	5	5	6	5	3	5	Yes, they were very clear.			7		1	1	1		1	0	5	4	3.33	4.5	5.33	5.33
R_4PaBhef95TwjTO5	7	1	1	1	7	1	3	7	7	1	7	6	4	3	5	6	6	6	7	7	7	2	6	7	7	1	7	7	7	7	4	5	Yes, but it would have helped to have been able to reference the passage.	None.	None.	7		1	1	1		1	0	7	5	6	6.83	7	7
R_cJ7u6QtEsucKDFH	7	1	1	1	7	1	3	6	3	3	5	4	4	4	4	7	6	5	6	6	5	6	2	6	6	1	7	6	6	6	3	5	Yes I understood the questions being asked with little to no trouble.	There are multiple questions that are asking the same question.	Interesting and made me think of how I view nurses.	7		2	1	1		1	0	4.67	4	6	5.17	6	6
R_5chlkkVzyoecO45	7	1	1	1	7	1	3	5	5	3	5	3	3	5	3	6	5	3	6	6	6	1	7	6	6	1	7	6	6	6	5	2	The instructions were very clear and easy to follow. The questions were straightforward and didn't have any ambiguity to them. They followed the story very well and didn't try to confuse you.	I do not have any suggestions for improving the survey.	I do not have any other comments regarding this study.	7		1	1	1		1	0	5	3	4.67	6.17	6	6
R_0vTMkNzxxKnHR5z	7	1	1	1	7	1	3	3	3	5	3	4	4	6	2	6	7	5	7	7	7	1	7	7	7	1	7	7	7	7	4	6	Yes! All of the instructions and questions were very clear and easy to answer.	No; I thought the survey was well put together and made sure that the participant was paying attention.		7		1	1	1		1	0	3	3.33	6	7	7	7
R_0uLKdtcyxM1hKQJ	7	1	1	1	7	1	3	7	7	1	7	4	4	4	4	7	7	7	7	7	7	1	7	7	7	1	7	7	7	7	7	1	Yes, the instructions were extremely easy and when the researcher asked the participants to answer a certain way was a good way because it kept me on track.	No, the survey was great!	No	1		1	1	1		1	0	7	4	7	7	7	7
R_79771nv8qyiRWzH	7	1	1	1	7	1	3	6	6	2	6	4	4	5	3	6	6	5	6	6	6	1	7	6	6	1	7	7	7	7	4	5	yes	no	no	7		2	1	1		1	0	6	3.67	5.67	6.17	7	7
R_6WMODH0OCyMt7jT	7	1	1	1	7	1	3	6	4	4	4	5	5	2	6	7	6	4	7	7	7	1	7	7	7	1	7	7	7	7	6	1	yes, they were well worded and not too long.		Give more scenarios	7		1	1	1		1	0	4.67	5.33	5.67	7	7	7
R_9mALP2RHD1BusOV	7	1	1	1	7	1	3	7	6	2	6	5	5	3	5	6	6	5	6	6	7	1	7	7	7	1	7	5	6	5	5	2	The instructions were great and I had no trouble understanding any of the questions.	None at all!		7		1	1	1		1	0	6.33	5	5.67	6.67	5.33	5.33
R_bkXZKGycoJDt6Gp	7	1	1	1	7	1	3	5	5	3	5	5	5	3	5	6	5	5	6	6	6	2	6	6	6	7	1	7	7	6	5	2	Yes, all instruction were easy to follow except when asked about certain emotions that were either not displayed at all or were not noticed.	No, I do not.	No, I do not.	7		2	1	1		1	0	5	5	5.33	6	6.67	6.67
R_9taXgEkXYwncrlP	7	1	1	1	7	1	3	6	6	2	6	5	5	3	5	5	5	5	6	7	6	3	5	5	6	1	7	5	6	6	5	5	Yes! We were told to read the passage carefully and answer the questions accordingly. I didn't feel confused about what to do at any point.	None	None	1		1	1	1		1	0	6	5	5	5.83	5.67	5.67
R_6DzW9vq1MviKzqt	7	1	1	1	7	1	3	6	6	2	6	4	4	4	4	4	4	4	6	6	6	1	7	6	6	1	7	6	6	6	4	4	Yes			7		2	1	1		1	0	6	4	4	6.17	6	6
R_4YO5wmPlOHBAGUZ	7	1	1	1	7	1	3	6	2	5	3	4	4	3	5	6	5	6	4	5	4	1	7	4	5	1	7	6	6	3	4	2	Yes, the instructions were clear.	No, I do not have any suggestions.	No	7		2	1	1		1	0	3.67	4.33	5.67	4.83	5	5
R_5zLIH2sT16DEcN7	7	1	1	1	7	1	3	7	7	1	7	6	6	1	7	5	5	5	7	7	7	1	7	7	7	1	7	7	7	7	6	5	Yes they were direct and easy to read	n/a	Quick, easy to read. Liked it	7		1	1	1		1	0	7	6.33	5	7	7	7
R_0oiaS3KGnEisGHP	7	1	1	1	7	1	3	2	2	2	6	3	3	1	7	4	5	2	5	5	5	1	7	5	6	1	7	4	6	5	4	4	Yes, I had no trouble understanding or answering the questions.	No	No	2		2	1	1		1	0	3.33	4.33	3.67	5.5	5	5
R_cCmM9AZGvpLFIKF	7	1	1	1	7	1	3	5	3	3	5	5	3	3	5	5	3	5	5	6	6	1	7	6	6	1	7	5	5	5	3	5	yes, they were easy to follow and understand.	many questions were the same.		8		2	1	1		1	0	4.33	4.33	4.33	6	5	5
R_dipjzePVzhpRlop	7	1	1	1	7	1	3	1	6	2	6	5	5	3	5	6	5	4	6	6	6	2	6	6	6	1	7	5	6	6	4	4	Yes they were.	Nope	the general thought on the masculinity and femininity of a job and my thoughts on it do not correlate.	7		2	1	1		1	0	4.33	5	5	6	5.67	5.67
R_3IwFokVpmP2d1g9	7	1	1	1	7	1	3	7	6	2	6	3	3	4	4	6	6	4	7	7	7	1	7	6	6	1	7	7	6	7	3	2	Yes, it was clear that the person taking the survey should read the short story paragraph very carefully and the questions that followed were also clear and easy to understand.	One suggestion would be to inform the person taking the survey to re-read the short story paragraph one more time on another page to ensure they read it more carefully.	This was a good study that made me think about the reality of the nursing occupation.	1		2	1	1		1	0	6.33	3.33	5.33	6.67	6.67	6.67
R_e2payLMYDxxSqIR	7	1	1	1	7	1	3	6	6	2	6	5	5	3	5	5	4	3	6	6	6	1	7	6	6	1	7	6	7	6	5	2	Yes, we were given a simple paragraph to read as explained by the first question, and a set of answers to choose from.	Add one more example to provide more data.		7		1	1	1		1	0	6	5	4	6.17	6.33	6.33
R_9yuq0lZXzIFgQ6N	7	1	1	1	7	1	3	7	7	2	6	4	4	4	4	7	5	5	7	7	7	2	6	5	7	1	7	7	7	7	4	4	Yes. Very clear and descriptive			7		1	1	1		1	0	6.67	4	5.67	6.5	7	7
R_e4fDTD8ZP6FkNxj	7	1	1	1	7	1	3	6	1	5	3	2	2	5	3	5	4	4	7	7	7	1	7	7	7	1	7	6	7	7	4	5	Yes. Every question was very clear.	Don't make the hidden questions making sure you paid attention so obvious. Of course I answered every question honestly.	There could have been more than one situation.	7		2	1	1		1	0	3.33	2.33	4.33	7	6.67	6.67
R_cDdEdFbry2QC7hX	7	1	1	1	7	1	3	5	5	3	5	3	3	4	4	5	4	3	5	5	5	2	6	4	4	2	6	5	5	5	5	3	Yes	No	No	1		2	1	1		1	0	5	3.33	4	4.83	5	5
R_cYKOAddeTzghPYp	7	1	1	1	7	1	3	6	6	2	6	5	5	2	6	7	6	6	6	7	7	2	6	6	7	1	7	7	7	5	5	4	Yes, I was able to understand all of the instructions listed for this survey. I did not have any problems completing the survey.	No, I liked that there were designated questions for the surveyor to answer specifically so a person could not just click a random response.	No	7		2	1	1		1	0	6	5.33	6.33	6.5	6.33	6.33
R_bsGwznlVcwtP4XP	7	1	1	1	7	1	3	6	3	5	3	6	6	1	7	6	7	7	5	5	5	1	7	4	5	1	7	5	5	6	6	2	Yes. The only confusing aspect of the instructions is when I was told which answer to pick.	Leave out the questions that have the answers already provided.	I think the questions revealed common misconceptions about masculinity and femininity. Being a nurse, or tearing up for that matter, makes you no less masculine.	7		2	1	1		1	0	4	6.33	6.67	5.17	5.33	5.33
R_0IXHkKUAAQkSC2x	7	1	1	1	7	1	3	5	6	2	6	3	4	5	3	5	4	4	7	6	6	1	7	6	6	2	6	6	7	5	5	3	Yes they told me what to answer and do.	No	No	7		2	1	1		1	0	5.67	3.33	4.33	6.33	6	6
R_cPe95dREU9RzyM5		1	1	1	7	1	3	6	5	3	5	5	4	4	4	5	5	4	6	7	6	1	7	5	6	1	7	6	7	7	5	5	Yes I understood them all.			7		2	1	1		1	0	5.33	4.33	4.67	6.17	6.67	6.67
R_bPghZ5ct7YRN76J	7	1	1	1	7	1	3	6	4	4	4	5	5	6	2	7	4	2	7	7	7	1	7	5	7	1	7	6	7	4	3	4	Yes, I did not have any confusion.	No	No	7		2	1	1		1	0	4.67	4	4.33	6.67	5.67	5.67
R_2aRzI16lm3HCEHr	7	1	1	1	7	1	3	6	6	2	6	5	4	2	6	6	5	4	6	6	6	2	6	5	6	1	7	6	7	6	4	3	Yes. Nothing was confusing, and everything was well laid out.	Perhaps explicitly stating there will be knowledge retention questions would allow people like me, who do not have very good working memory, to score more highly on that section. This is, of course, assuming memory is not what is being researched in the urvey.	I was a bit sad I did not get to mention I didn't think Dan's explicit lack of masculinity as it is seen in our culture was a bad thing.	7		2	1	1		1	0	6	5	5	5.83	6.33	6.33
R_1SyJ30U7lcp1JjL	7	1	1	1	7	1	3	5	2	6	2	2	3	5	3	4	3	2	6	6	7	1	7	6	6	1	7	5	7	5	3	5	All of the instruction were very easy to comprehend and follow.	N/A		7		2	1	1		1	0	3	2.67	3	6.33	5.67	5.67
R_9WWfTYuT5xUIhOB	7	1	1	1	7	1	3	5	5	4	4	3	4	2	6	5	5	4	4	4	5	2	6	3	3	2	6	6	5	5	6	5	Yes. I am literate.	I don't know what you're studying, so no.	I bet you get a lot of similar answers...	7		2	1	1		1	0	4.67	4.33	4.67	4.17	5.33	5.33
R_6SvMBAhXMwNMlk9	7	1	1	1	7	1	3	6	5	3	5	4	4	3	5	3	4	4	4	4	5	2	6	5	5	2	6	4	5	4	4	2	yes	no	no	7		2	1	1		1	0	5.33	4.33	3.67	4.83	4.33	4.33
R_bfpTHMKpWvAcErr	7	1	1	1	7	1	3	6	4	3	5	3	3	5	3	5	4	3	5	7	6	2	6	4	5	2	6	6	5	6	4	4	Yes.	You need more details for the vignette. How am I, a participant, supposed to derive Dan's personal qualities (eg trustworthiness) from a snapshot of his job in which those qualities are not shown because they are not applicable?	Remove the user input areas which instruct the participant to enter the stated value.	7		2	1	1		1	0	5	3	4	5.5	5.67	5.67
R_5z3aLLa3Q131NZP	7	1	1	1	7	1	3	7	7	2	6	5	4	2	6	6	3	3	5	5	4	2	6	5	3	1	7	3	3	4	5	3	Yes. The values were clearly labeled and not hard to follow.		Found questions interesting.	9	Ethiopian- American	2	1	1		1	0	6.67	5	4	4.67	3.33	3.33
R_dirAioHP7pGzgGN	7	1	1	1	7	1	3	6	6	2	6	4	3	4	4	5	6	5	6	6	6	1	7	6	6	1	7	5	6	6	4	3	Yes I was able to answer all the questions and understand them.			7		2	1	1		1	0	6	3.67	5.33	6.17	5.67	5.67
R_6ExdyVWcMKAIm7r	7	1	1	1	7	1	3	6	5	2	6	5	5	4	4	4	4	4	5	5	5	2	6	4	5	1	7	6	4	4	4	4	Yes they were very much so.	Nope, all was good.	No I do not.	7		2	1	1		1	0	5.67	4.67	4	5	4.67	4.67
R_ehqoFAxdZsCmtwx	7	1	1	1	7	1	3	6	5	2	6	4	4	2	6	6	5	4	6	7	6	1	7	4	6	1	7	3	2	5	4	3	Yes. I had no difficulty understanding the instructions.			7		2	1	1		1	0	5.67	4.67	5	6	3.33	3.33
R_8HpdaphR6hlqyi1	7	1	1	1	7	1	3	7	5	4	4	3	3	5	3	5	6	5	6	6	6	1	7	6	6	2	6	5	7	6	5	4	Yes, everything was clear.	No, everything was clear and easy to understand.	N/A	7		2	1	1		1	0	5.33	3	5.33	6.17	6	6
R_8iB27tR9B3SPFuR	7	1	1	1	7	1	3	6	6	2	6	4	4	4	4	5	5	4	6	6	6	1	7	4	5	1	7	6	6	6	4	2	Yes, very much so.			9	Indian	2	1	1		1	0	6	4	4.67	5.67	6	6
R_233NtIhUz2oyjkN	7	1	1	1	7	1	3	5	5	3	5	3	3	5	3	4	5	4	5	6	6	1	7	6	6	1	7	6	6	6	3	4	Yes, I was able to follow the procedure very easily and without any trouble.			7		1	1	1		1	0	5	3	4.33	6	6	6
R_eh4jBJNjN7z9pl3	7	1	1	1	7	1	3	5	6	2	6	4	4	4	4	6	6	5	5	5	5	2	6	5	5	1	7	5	4	5	4	2	Yes they were.			7		1	1	1		1	0	5.67	4	5.67	5.17	4.67	4.67
R_6QJZax7OercXpbL	7	1	1	1	7	1	3	7	7	2	6	3	2	5	3	5	4	2	6	6	6	2	6	6	6	1	7	6	7	6	3	5	Yes			7		1	1	1		1	0	6.67	2.67	3.67	6	6.33	6.33
R_9GDt0gU7VS5GJU1	7	1	1	1	7	1	3	5	4	3	5	4	3	3	5	5	4	4	5	6	6	1	7	4	4	1	7	5	5	4	3	5	Yes, all of the instructions were clear and easy to follow.	No.	No.	7		1	1	1		1	0	4.67	4	4.33	5.33	4.67	4.67
R_eR2uNejX3X4Z4VL	7	1	1	1	7	1	3	7	7	1	7	2	3	4	4	5	5	3	6	7	7	1	7	6	6	1	7	6	6	6	3	2	Yes, the instructions were very straight forward and easy to comprehend and follow along with.	I think the passage about Dan and the boy should be slightly more detailed and longer.	No	7		1	1	1		1	0	7	3	4.33	6.5	6	6
R_byCrVAUqLVGPh5z	7	1	1	1	7	1	3	7	7	1	7	7	7	1	7	7	7	7	7	7	7	1	7	5	7	1	7	7	7	7	7	1	Yes, very much. Very self explanatory	Nope	Nope	6		2	1	1		1	0	7	7	7	6.67	7	7
R_a59CSPWTtZ1Q8eN	7	1	1	1	7	1	3	7	5	2	6	4	4	3	5	7	7	5	6	6	6	1	7	6	7	1	7	7	6	6	5	2	yes. as a psychology student, it was nice to see such a concrete format of questioning. there was no confusion for me as I went through the survey.			7		2	1	1		1	0	6	4.33	6.33	6.33	6.33	6.33
R_38AfnXhqBFhCxYV	7	1	1	1	7	1	3	6	6	2	6	6	6	2	6	6	6	6	6	6	7	4	4	4	4	3	5	6	5	5	6	2	Yes. The instructions were written in a clear and constructive manner.	Limit the questions directed toward determining if the participants are truthfully answering the questions. (I.E. Please click option 7-strongly agree.)		7		2	1	1		1	0	6	6	6	5.17	5.33	5.33
R_6tUAPP4NTUuNOwB	7	1	1	1	7	1	3	5	5	2	6	5	5	5	3	2	2	2	5	7	7	1	7	5	5	1	7	5	4	6	7	1	Yes, simple as can be	Perhaps try not to make the survey's purpose as obvious. It seemed what you were trying to get at was the idea that "people who cry are considered in society as feminine, weak, sensitive. Maybe try adding in a few questions here and there to throw off theresponder. I say this because I was able to see the point of the questions, and so I strayed away from the social norms of all the generalizatio…	It was a good study. I like it because there are generalizations and stereotypes for everything and it is a bit ridiculous most of the time. There shouldn't be any jobs, emotions, etc that are associated with one gender, race, ethnicity etc.	7		2	1	1		1	0	5.33	4.33	2	6	5	5
R_0JL4T1GrnCd5fEN	4	0	3	0	7	1	1	4	4	4	4	3	2	2	6	4	4	4	2	3	3	3	5	3	3	3	5	3	3	3	4	3	The instructions were relatively easy to follow, although, I wish I had read the paragraph more thoroughly and/or taken notes.	I think the survey was fine. The questions became a little repetitive at some points however.	Nope!	3		1	1	1		1	0	4	3.67	4	3.17	3	3
R_eVBhohc61YrALhr	7	1	1	1	7	1	3	6	6	2	6	4	4	3	5	6	6	5	6	6	6	1	7	7	7	1	7	6	5	6	6	2	Yes, I understood what was being asked of me and the story was concise and not boring. The survey wasn't long and unnecessary. .	No	No	7		1	1	1		1	0	6	4.33	5.67	6.5	5.67	5.67
R_e9FwKuuMKCvClLf	7	1	1	1	7	1	3	5	5	3	5	5	5	3	5	5	5	5	5	6	6	2	6	5	6	2	6	5	5	6	5	3	Yes	No	No	1		1	1	1		1	0	5	5	5	5.67	5.33	5.33
R_cTsqphtKvg3ZwrP	7	1	1	1	7	1	3	7	6	2	6	4	4	3	5	6	5	4	6	6	6	1	7	5	6	1	7	6	7	6	5	4	yes	no	no	7		1	1	1		1	0	6.33	4.33	5	6	6.33	6.33
R_4Uia4tLq9HiVH5H	7	1	1	1	7	1	3	6	5	3	5	6	6	2	6	6	3	3	6	6	6	1	7	4	6	1	7	5	6	6	4	4	Yes they were straight to the point	No	none	1		1	1	1		1	0	5.33	6	4	5.83	5.67	5.67
R_8kucCwmpRHvskex	1	0	1	1	7	1	2	6	5	4	4	3	3	4	4	5	5	5	5	6	7	1	7	5	6	1	7	4	5	4	6	2	Yes, all of the instructions were clear and easy to follow. I did not have a problem understanding any of the questions. They were all well-worded.	I do not have any suggestions for improving this survey.	I do not have any other comments regarding this study.	7		1	1	1		1	0	5	3.33	5	6	4.33	4.33
R_bpvspatlNkAQRU1	5	0	1	1	7	1	2	6	6	2	6	5	4	3	5	5	5	4	5	6	6	1	7	4	5	1	7	4	6	5	5	3	Yes, the instructions were clear.			1		1	1	1		1	0	6	4.67	4.67	5.5	5	5
R_escz4wZAaKkHGcd	7	1	1	1	7	1	3	5	3	6	2	2	2	5	3	4	4	4	7	6	6	1	7	6	6	1	7	6	7	6	4	4	Yes. There was no confusion and I was able to fluidly go through the survey.			1		1	1	1		1	0	3.33	2.33	4	6.33	6.33	6.33
R_5ak2dHmPF9S2HM9	7	1	1	1	7	1	3	5	3	4	4	3	3	5	3	5	6	4	6	6	7	1	7	6	6	1	7	6	7	6	5	2	Yes	No		7		1	1	1		1	0	4	3	5	6.33	6.33	6.33
R_1Nr6IkGoNiJ502x	7	1	1	1	7	1	3	6	6	4	4	3	3	4	4	3	5	6	2	2	6	1	7	4	4	1	7	5	5	6	3	5	Yes, they made perfect sense.	The story was confusing.		7		1	1	1		1	0	5.33	3.33	4.67	4.17	5.33	5.33
R_3pL0EEuUSg0vyG9	7	1	1	1	7	1	3	6	7	1	7	3	3	5	3	5	4	4	4	7	4	4	4	5	4	1	7	7	7	4	4	4	Yes they were all clear and easy to follow. I did not have trouble at all.			7		1	1	1		1	0	6.67	3	4.33	4.67	6	6
R_d5RpHbOtENPECP3	7	1	1	1	7	1	3	6	3	4	4	4	4	5	3	4	3	3	5	6	5	2	6	5	6	1	7	5	7	5	3	5	yes! Very direct, not confusing at all			7		1	1	1		1	0	4.33	3.67	3.33	5.5	5.67	5.67
R_cFHeAdjS5llN2At	7	1	1	1	7	1	3	6	6	2	6	5	4	3	5	6	4	3	5	5	5	2	6	6	6	7	1	5	6	4	6	2	Yes the instructions were clear and easy to follow. I had no trouble understanding what I needed to do and accomplish.			7		1	1	1		1	0	6	4.67	4.33	5.5	5	5
